1 **Effects of species traits and ecosystem characteristics on species detection by eDNA**  
2 **metabarcoding in lake fish communities**

3

4 Hideyuki Doi<sup>1,\*†</sup>, Shunsuke Matsuoka<sup>1,†</sup>, Shin-ichiro S. Matsuzaki<sup>2,†</sup>, Mariko Nagano<sup>1</sup>,  
5 Hirotooshi Sato<sup>3</sup>, Hiroki Yamanaka<sup>4</sup>, Saeko Matsushashi<sup>5</sup>, Satoshi Yamamoto<sup>6</sup>, Toshifumi  
6 Minamoto<sup>7</sup>, Hitoshi Araki<sup>8</sup>, Kousuke Ikeda<sup>9</sup>, Atsuko Kato<sup>9</sup>, Kouichi Kumei<sup>9</sup>, Nobutaka  
7 Maki<sup>9</sup>, Takashi Mitsuzuka<sup>9</sup>, Teruhiko Takahara<sup>10,11</sup>, Kimihito Toki<sup>9</sup>, Natsuki Ueda<sup>9</sup>,  
8 Takeshi Watanabe<sup>9</sup>, Kanji Yamazoe<sup>12</sup>, and Masaki Miya<sup>13</sup>

9

10 <sup>1</sup>Graduate School of Simulation Studies, University of Hyogo, 7-1-28 Minatojima-  
11 minamimachi, Chuo-ku, Kobe, Japan. <sup>2</sup>Center for Environmental Biology and  
12 Ecosystem Studies, National Institute for Environmental Studies, 16-2 Onogawa,  
13 Tsukuba, Japan. <sup>3</sup>Graduate School of Human and Environmental Studies, Kyoto  
14 University, Yoshida-Nihonmatsu-cho, Sakyo-ku, Kyoto, Japan. <sup>4</sup>Faculty of Science and  
15 Technology, Ryukoku University, Seta-Oe, Otsu, Japan. <sup>5</sup>National Agriculture and  
16 Food Research Organization, Tsukuba, Japan. <sup>6</sup>Department of Zoology, Graduate  
17 School of Science, Kyoto University, Kitashirakawaoiwake-cho, Sakyo-ku, Kyoto,  
18 Japan. <sup>7</sup>Graduate School of Human Development and Environment, Kobe University, 3-  
19 11 Tsurukabuto, Nada-ku, Kobe, Japan. <sup>8</sup>Research Faculty of Agriculture, Hokkaido  
20 University, N9, W9, Sapporo, Japan. <sup>9</sup>Pacific Consultants Co., Ltd, 3-22, Kanda-  
21 Nishikicho, Chiyoda-ku, Tokyo, Japan. <sup>10</sup>Faculty of Life and Environmental Sciences,  
22 Shimane University, 1060 Nishikawatsu-cho, Matsue, Japan. <sup>11</sup>Estuary Research  
23 Center, Shimane University, 1060 Nishikawatsu-cho, Matsue, Japan. <sup>12</sup>Pacific  
24 Consultants Environment Research Co., Ltd, 474, Hiregasaki, Nagareyama, Chiba,

25 Japan. <sup>13</sup>Department of Ecology and Environmental Sciences, Natural History Museum  
26 and Institute, Aoba-cho, Chuo-ku, Chiba, Japan

27

28 †These authors contributed equally to this study.

29

30 \*Corresponding author: Hideyuki Doi ([hideyuki.doi@icloud.com](mailto:hideyuki.doi@icloud.com))

31

32 **Abstract**

33 Although environmental DNA (eDNA) metabarcoding is acknowledged to be an  
34 exceptionally useful and powerful tool for monitoring surveys, it has limited  
35 applicability, particularly for nationwide surveys. To evaluate the performance of  
36 eDNA metabarcoding in broad-scale monitoring, we examined the effects of species  
37 ecological/biological traits and ecosystem characteristics on species detection rates and  
38 the consequences for community analysis. We conducted eDNA metabarcoding on fish  
39 communities in 18 Japanese lakes on a country-wide scale. By comparing species  
40 records, we found that certain species traits, including body size, body shape, saltwater  
41 tolerance, and habitat preferences, influenced eDNA detection. We also found that the  
42 proportion of species detected decreased significantly with an increase in lake surface  
43 area, owing to an ecosystem-size effect on species detection. We conclude that species  
44 traits, including habitat preferences and body size, and ecosystem size should be taken  
45 into consideration when assessing the performance of eDNA metabarcoding in broad-  
46 scale monitoring.

47

48 **Keywords:** environmental DNA, community, high-throughput parallel DNA sequencing  
49 (HTS), MiFish primers

50

## 51 **Introduction**

52 An ongoing global decline in biodiversity is beyond doubt and is particularly  
53 pronounced in freshwater ecosystems<sup>1-3</sup>. Nevertheless, despite concerns regarding the  
54 loss of local/global freshwater fish diversity<sup>1,2,4</sup>, there has been a recent tendency to  
55 scale back on investments in monitoring and museum collections<sup>5,6</sup>. An understanding  
56 of the prevailing status and trends of biodiversity provides a bedrock for ecological  
57 research and conservation biology<sup>1,2</sup>, and in this regard, Matsuzaki et al.<sup>7</sup> highlighted  
58 that long-term trends in local-scale fish diversity have not been comprehensively  
59 monitored at broader scales (i.e., national or continental scales) and that performing  
60 broad-scale surveys of fish communities is essential for planning fish management and  
61 conservation measures<sup>8</sup>. However, the number of lake fish surveys conducted by  
62 national and local governments have recently declined<sup>5,6,9</sup>. Given this undesirable trend,  
63 it would be prudent to develop broad-scale survey methods for fish monitoring, which  
64 could be employed in conducting national-level surveys and thereby provide a basis for  
65 formulating conservation policies.

66           Recent advances in molecular ecology have seen the emergence of  
67 environmental DNA (eDNA) analysis as a useful approach for investigating the  
68 distribution and richness of aquatic and terrestrial organisms<sup>10-16</sup>, and high-throughput  
69 parallel DNA sequencing has recently been applied to eDNA methods for simultaneous  
70 detection of multiple taxa, known as eDNA metabarcoding<sup>16-21</sup>. For example, Miya et  
71 al.<sup>22</sup> designed and applied universal PCR primers (MiFish primers) for fish eDNA  
72 metabarcoding, and MiFish primers recently developed for different fish taxa<sup>15,16,23</sup> have  
73 shown higher performance compared with other primers types<sup>24</sup> and PCR conditions<sup>25</sup>.

74 eDNA metabarcoding is acknowledged to be an exceptionally useful and  
75 powerful tool for community surveys<sup>16-20,26,27</sup>, and consequently, in recent years, this  
76 technique has been widely applied in aquatic community surveys worldwide<sup>28</sup>.  
77 However, despite the growing number of eDNA metabarcoding studies being  
78 conducted, the performance of eDNA metabarcoding applied in broad-scale (e.g.,  
79 national-wide) surveys has, with a few exceptions<sup>18,26,29</sup>, yet to be sufficiently evaluated  
80 quantitatively and statistically<sup>28</sup>.

81 From the perspective of evaluating the performance of eDNA metabarcoding  
82 surveys, we hypothesized that the ecological/biological traits of targeted species and  
83 ecosystem characteristics would influence the detection of species when using eDNA  
84 metabarcoding; based on the fact that fish ecological/biological traits (e.g., body size  
85 and habitat preference) have been considered to be factors that affect the detectability of  
86 eDNA<sup>30,31</sup>. In this regard, Pont et al.<sup>31</sup> revealed differences in the traits of fish detected  
87 in a large river using eDNA metabarcoding and traditional survey methods. Differences  
88 in the relative abundance of fish related to habitat preference (benthic or pelagic),  
89 dietary type, and level of tolerance to water pollution have also been detected in  
90 comparisons between eDNA metabarcoding and traditional surveys<sup>31</sup>. The findings of  
91 these studies indicate that the ecological/biological traits of fish species, such as body  
92 size and shape, habitat preference, and environmental tolerance, may influence specific  
93 detection rates when using eDNA metabarcoding. However, despite the increasing  
94 evidence of the effects of species traits on the detectability of eDNA, assessments of  
95 these effects across spatially broad areas, for example, entire countries with diverse  
96 species, are still minimal. Given the same sampling effort, the detection of species  
97 eDNA may also depend on certain ecosystem characteristics, such as ecosystem size

98 (area and volume) and habitat types and variation. For example, eDNA metabarcoding  
99 may achieve a lower rate of species detection in larger lakes where greater sampling  
100 effort is required to characterize fish communities.

101 In an effort to gain a better understanding of the factors that could potentially  
102 influence to the efficacy of eDNA metabarcoding, we conducted surveys of fish  
103 communities in 18 lakes distributed throughout Japan using universal MiFish primers<sup>22</sup>  
104 and compared the results obtained with the records of over 200 fish species (including  
105 non-native species) inhabiting these lakes<sup>7</sup>. Based on this comparison, we were able to  
106 assess the validity of the aforementioned hypotheses regarding the use of eDNA  
107 metabarcoding surveys. Moreover, to evaluate the utility of different sampling methods  
108 for broad-scale eDNA surveys, we also conducted a survey using individual and mixed  
109 water sampling techniques and different cooling and freezing methods to evaluate the  
110 effects of sampling and transportation on the findings of eDNA surveys. Finally, we  
111 discuss the applicability of eDNA metabarcoding for broad-scale monitoring in lake  
112 fish, taking into consideration species traits and ecosystem characteristics.

113

## 114 **Results**

### 115 *Sequencing and eDNA metabarcoding overview*

116 Given that we obtained a sufficient proportion of sequences from the raw data and that,  
117 with the exception of Lake Shikotsu, there were very few non-fish sequences (Table  
118 S2), we assumed MiSeq sequencing and pipeline analysis of the sequence data to have  
119 been successful. MiSeq paired-end sequencing for library construction (N = 178: 144  
120 samples, 18 field and filter blanks, and 16 PCR negative controls) yielded a total of

121 5,208,062 sequences [29,258 ± 23,237 (mean ± SD) sequences for each sample, Table  
122 S2].

123

124 *Number of detected fish taxa*

125 In total, 119 fish taxa were detected based on eDNA metabarcoding, and all detected  
126 taxa were identified to the species or genus level (Table S4, Figs. 1 and S3). We found  
127 significant differences among the different sampling methods with respect to the  
128 number of fish taxa detected using eDNA metabarcoding (nested ANOVA with LMM,  
129  $P < 0.001$ , Table S5 and Fig. S4). However, we also detected six species in 23 of the  
130 negative and field controls. We obtained sequence reads from six species (*Carassius*  
131 *auratus*, *Chelon haematocheilus*, *Micropterus salmoides*, *Pagrus major*, *Rhinogobius*  
132 spp., and *Tribolodon hakonensis*, Table S4). Furthermore, five species found in the fish  
133 records had lower sequence reads (sequences < 276) in the controls than in the samples.  
134 In contrast, *Pagrus major* (Red seabream) was not found in the records and does not  
135 inhabit the surveyed lakes. The number of sequence reads obtained for *P. major*  
136 (sequences = 29 and 452) were found to be higher than those species in the samples  
137 (sequences = 20 and 21). Thus, we assumed that the species DNA was contaminated and  
138 excluded the species from further analyses.

139 We found differences in the number of fish taxa in the different lakes (Figs. 1  
140 and S5), and the number of fish taxa detected using the Mix\_cool and Mix\_freeze  
141 methods was significantly higher than those detected based on individual sampling (Fig.  
142 2a, nested ANOVA with LMM,  $P < 0.001$  and Tukey's multiple comparison, Table S5).  
143 Nevertheless, we found that some species detected in the individual samples were not  
144 detected in the Mix\_cool and Mix\_freeze samples (Table S4).

145

146 *Percentage record covered*

147 To evaluate the species detection performance of eDNA metabarcoding, we used  
148 “percentage record covered (%)” as a measure to indicate the proportion of eDNA-  
149 detected species (number of species) matching those in the species records. We  
150 accordingly found that the percentage record covered did not differ significantly among  
151 the three sampling methods (Fig. 2b, nested ANOVA with LMM,  $P = 0.249$ , Table S5),  
152 although values were found to differ among the surveyed lakes (Fig. S6).

153 We also compared the ecological/biological traits of species groups frequently  
154 detected using eDNA metabarcoding or in the species records, which was evaluated  
155 based indicator taxa analysis (Fig. 3). All the nested ANOVAs with linear mixed  
156 models (LMMs) for the fish traits revealed significant differences between eDNA  
157 metabarcoding and the species records, whereas no significant differences were detected  
158 among the different sampling methods (Table S6). We found that species detected at a  
159 higher frequency using eDNA metabarcoding tended to have shorter body lengths (Fig.  
160 3a), mainly inhabit the benthopelagic zone (Fig. 3b), and are saltwater tolerant (Fig. 3c).  
161 With respect to lateral body shape types, smaller proportions of eel-like species, either  
162 short, deep bodied, or both, were identified among those species detected with a higher  
163 frequency using eDNA metabarcoding than in the species records (Fig. 3d).

164 To evaluate the effect of lake limnological features on the percentage record  
165 covered, we used generalized linear models (GLMs), which revealed a significant  
166 negative effect of surface area on the percentage record covered ( $P < 0.018$ , Table S7,  
167 Fig. 4), whereas for all sampling methods used, there were no significant differences  
168 with respect to latitude, mean water depth, trophic state, or water type ( $P > 0.05$ , Table



169 S7). The relationship between the percentage record covered and the non-included  
170 factors to the final GLMs are shown in Fig. S7.

171

### 172 *Community analysis*

173 Using indicator taxa analysis, we established that certain species were  
174 detected at a significantly higher frequency using eDNA metabarcoding than indicated  
175 in the species records for the 18 surveyed lakes (please refer to Table 1 for species with  
176 significantly higher frequencies determined by eDNA metabarcoding and all results in  
177 Table S8). For example, *C. auratus* was significantly more frequently detected using all  
178 three sampling methods, whereas *Zacco platypus* was significantly more frequently  
179 detected in the individual and Mix\_freeze samples, *Hemibarbus labeo* and  
180 *Hypophthalmichthys nobilis* were more frequently detected in individual samples, and  
181 *Rhinogobius* spp. were significantly more frequently detected in Mix\_freeze samples.

182 Non-metric multidimensional scaling (NMDS) ordination analysis revealed  
183 dissimilarities in fish communities among the surveyed lakes and between eDNA  
184 metabarcoding and the species records (Fig. 5 for Mix\_cool and Figs. S8 and S9 for  
185 individual and Mix\_freeze, respectively). Similarly, PERMANOVA analysis revealed  
186 significant differences among the lakes and between eDNA metabarcoding and the  
187 species records ( $P < 0.003$ , Table S9).

188

189

### 190 **Discussion**

191 In this study, we observed a difference in the ecological/biological traits of fish species  
192 and lake limnological features relating to the eDNA-evaluated community structure and  
193 species detection based on broad-scale eDNA and direct surveys.

194           We initially compared the efficacy of three different sampling methods  
195 (individual, Mix\_cool, and Mix\_freeze sampling) for water collection, and accordingly  
196 found that the number of fish taxa detected using Mix\_cool and Mix\_freeze methods  
197 was significantly higher than that detected using individual sampling. In contrast, we  
198 detected no significant differences among these sampling methods based on the  
199 percentage of record covered, NMDS, or indicator taxa analyses. In this regard, Sato et  
200 al.<sup>20</sup> suggested that mixed samples can be used for fish community comparisons despite  
201 a somewhat lower detection rate for certain rare species, and this indeed appeared to  
202 hold true with respect to the lakes we sampled in the present study.

203           Our findings tended to indicate that the water transportation method (cool vs.  
204 frozen) had no significant influence on the efficiency of eDNA detection, which is  
205 consistent with the findings of Deiner et al.<sup>32</sup>, who reported a non-significant difference  
206 between cool and frozen water transportation on eDNA detection by quantitative PCR  
207 (qPCR), which is in contrast to the findings of Takahara et al.<sup>33</sup>, who found a reduction  
208 in the fish species detected using frozen preservation of water samples based on qPCR  
209 analyses. We thus believe that both methods may be useful for transporting water  
210 samples for eDNA analysis. In this regard, as a consequence of a field survey we  
211 conducted in 2015, Yamanaka et al.<sup>15</sup> developed a water preservation method for eDNA  
212 analysis that included the addition of the quaternary ammonium compound  
213 benzalkonium chloride (BAC), and we recommend using this BAC method for water  
214 transportation.

215           In order to evaluate the performance of eDNA metabarcoding, we examined  
216 the percentage record covered for all three sampling methods. We accordingly found  
217 that the values obtained for species records were approximately 30%, thereby indicating

218 that many of the species inhabiting the surveyed lakes, particularly pelagic species and  
219 those with lower occurrence, would not be detected using eDNA metabarcoding.

220 Below, we consider the factors (limnological features and species traits) that might  
221 contribute to the lower detection rates obtained using eDNA metabarcoding.

222 As factors that could potentially influence the efficacy of eDNA  
223 metabarcoding, we examined the selected ecological/biological traits of fish species,  
224 and accordingly found that species with shorter body length and normal body shape,  
225 those inhabiting benthopelagic habitats, and those showing tolerance to saltwater were  
226 frequently detected using eDNA metabarcoding. In previous eDNA studies, certain  
227 biological traits of fish, notably body size, have been considered to influence eDNA  
228 detection<sup>30,31</sup>. However, whereas the findings of several experimental studies have  
229 indicated that fish of larger body size release larger quantities of eDNA<sup>30</sup>, we found that  
230 species with shorter body length, as an index of body size, were detected more  
231 frequently using eDNA metabarcoding than their occurrence in the species records. We  
232 suspect that these differences are probably attributable to the size–abundance  
233 distribution of fish communities, which indicates that species with smaller body sizes  
234 are more abundant in lakes than are those of larger body size<sup>34</sup>. Lakes, particularly those  
235 characterized by brackish waters, harbor numerous marine-migratory fish species that  
236 show tolerance to saltwater, and eDNA metabarcoding surveys of lakes have detected  
237 many such migratory species<sup>16,27</sup>. Given that the timing of occurrence of species  
238 influences the detection of their eDNA<sup>35</sup>, the timing of migration would influence the  
239 detection of migratory species in lakes using eDNA metabarcoding, and consequently,  
240 may contribute to the infrequent detection of saltwater-tolerant species by eDNA  
241 metabarcoding in eDNA sampling surveys. Spatial heterogeneity in fish eDNA

242 concentrations/detection in aquatic ecosystems has previously been observed<sup>10,15,25,26</sup>,  
243 and Pont et al.<sup>31</sup> found that benthic species were detected at a higher rate using eDNA  
244 metabarcoding than by using traditional methods. This phenomenon would appear to  
245 suggest that the habitat preferences of fish might influence their detectability using  
246 eDNA metabarcoding. In this regard, the lakeshore water sampling conducted in the  
247 present study revealed the presence of numerous benthopelagic species based on eDNA  
248 metabarcoding, but relatively few pelagic species. Accordingly, in order to detect a  
249 larger number of pelagic species, we would need to perform offshore sampling, for  
250 example, using drone-assisted water collection for eDNA surveys<sup>36</sup>. The lateral body  
251 shape traits of species may also be associated with their micro-habitat use; for example,  
252 species with eel-like and short and/or deep body shapes appear to prefer sheltered  
253 micro-habitats (i.e., beneath stones) and pelagic zones. Consequently, the preference for  
254 macrohabitats, such as the benthic and pelagic zones, and their microhabitat use with  
255 respect to body shape types could serve as useful indices for evaluating eDNA  
256 detectability.

257           Evaluation of the effects of lake characteristics on the percentage record  
258 covered based on our modeling results revealed significant negative effects of lake  
259 surface area. Lakes with a larger ecosystem size are characterized by a broad diversity  
260 of habitats types, and correspondingly tend to support a higher diversity of fish  
261 species<sup>37,38</sup> and an increased proportion of pelagic zones<sup>39</sup>. Consequently, the size of  
262 lake ecosystems will tend to influence the rate of detection using eDNA metabarcoding.  
263 With respect to rivers, Bylemans et al.<sup>17</sup> found that river morphology influences the  
264 optimal sampling strategy for eDNA metabarcoding in these habitats, and in the present  
265 study, we identified a similar effect of ecosystem morphology on eDNA sampling

266 strategy in lakes. Taking into consideration the factors of sampling effort and  
267 expenditure, broad-scale surveys, such as nationwide surveys, tend to be constrained  
268 with respect to limited sample sizes, and given these circumstances, it may thus be  
269 important to assess the performance of eDNA metabarcoding-based limited sampling  
270 effort. In this regard, our GLM analysis predicted that the percentage record covered  
271 would decline to almost half (for example, from 30% to 15%) with an increase in lake  
272 surface area from 0.1 to 100 km<sup>2</sup>.

273         The utility of eDNA metabarcoding in evaluating fish community structure in  
274 lakes has been examined in previous studies that have compared eDNA metabarcoding  
275 and traditional sampling methods<sup>16,26</sup>. Similar to the previous results, we observed  
276 significant differences in the fish communities detected using eDNA metabarcoding and  
277 those in the species records. As discussed above, lake ecosystem size and the traits of  
278 fish species can influence the results obtained using eDNA metabarcoding, and  
279 consequently, we would expect these effects to be reflected in differences between fish  
280 community structures determined based on eDNA metabarcoding and the species  
281 record. We indeed found that similar to that shown in the species records, the fish  
282 community structure determined by eDNA metabarcoding showed significant  
283 differences among the surveyed lakes, thereby indicating that community analysis using  
284 this technique could compare the communities of different lakes. Although eDNA  
285 metabarcoding would be useful for broad-scale community surveys at low survey costs,  
286 we should carefully consider the influence of ecosystem characteristics and the traits of  
287 species within fish communities in such surveys.

288         We acknowledge that the present study does have certain limitations, and thus  
289 the conclusions we draw should be viewed as provisional and in need of further

290 verification. Notably, as we performed only single samplings for the eDNA survey, we  
291 were unable to evaluate the false negative/positive detection rates for fish species,  
292 which is a vital consideration in applying eDNA metabarcoding to biomonitoring<sup>40</sup>.  
293 eDNA sampling strategies are also prone to false-positive errors, owing to  
294 contamination and/or errors in PCR or sequencing, which may result in the spurious  
295 detection of species<sup>41,42</sup>. Accordingly, further studies are needed to confirm false  
296 negative/positive detection rates in lake eDNA surveys.

297           In conclusion, on the basis of a comparison with existing fish records, we  
298 were able to establish that certain traits of fish species and characteristics of ecosystems,  
299 particularly body size/shape, species habitat preferences, and ecosystem size, would be  
300 useful indices for optimizing eDNA metabarcoding sampling strategies, as well as for  
301 assessing the rates of species detection using eDNA methods. From the perspective of  
302 designing eDNA metabarcoding-based surveys to monitor aquatic communities across  
303 wide geographical areas, we should consider the ecological/biological traits of species  
304 and the characteristics of an ecosystem that can potentially influence species  
305 detectability.

## 306 307 **Methods**

### 308 *Study lakes and sampling sites*

309 For the survey described herein, we selected 18 lakes distributed throughout Japan (Fig.  
310 1), the locations of which are listed in Table S1. The lakes differed with respect to the  
311 surface area, water depth, volume, trophic state, and water type (brackish and  
312 freshwater), as shown in Table S1. Along the shores of each lake, we established six  
313 sampling sites separated by approximately equal distances (Fig. S1), none of which  
314 were located in the vicinity of river inflows/outflows.

315 As species-area accumulation curves in community surveys<sup>43,44</sup>, increasing  
316 the sample size would increase the detectability of species by eDNA metabarcoding<sup>20,45</sup>.  
317 Given that one of our aims in this study was to evaluate the effect of lake size on the  
318 detectability of species using eDNA metabarcoding, we conducted surveys with an  
319 equal number of sampling sites regardless of lake size.

320

### 321 *Collection water samples for eDNA survey*

322 Between 14 July and 4 November 2015, we collected samples of water at each of the six  
323 sampling sites located along the shores of the surveyed lakes, using three sampling  
324 methods, namely, “Individual,” “Mix\_cool,” and “Mix\_freeze” (Fig. S1) (Table S1).  
325 For convenience, to evaluate the monitoring methods, we collected water samples from  
326 the lakeshore and thereby avoided contamination via floating gears<sup>14</sup>. Initially, for the  
327 individual samples, we collected 1 L of surface water in a bottle. To avoid DNA  
328 contamination, we sterilized the bottles and all other equipment used in sampling,  
329 including filtering apparatus, using 10% commercial bleach (ca. 0.6% hypochlorous  
330 acid) followed by washing with DNA-free distilled water. For the Mix\_cool and  
331 Mix\_freeze samples, we collected two 150-mL samples of surface water at each of the  
332 six sampling sites, which were mixed in two sterilized bottles to give two composite  
333 water samples with final volumes of 900 mL. The “field blank” sample contained 1 L of  
334 DNA-free water, which we brought to the field and treated identically to the other water  
335 samples, with the exception that it was not exposed to the external environment at the  
336 field sites. The individual, Mix\_cool, and field blank water samples were stored on-site  
337 in a cooler with ice packs and transported to the laboratory in a 4°C refrigerator within 2

338 days. The Mix\_freeze samples were stored on-site in a cooler with ice packs, transferred  
339 to a -18°C freezer within 12 h, and transported frozen at -18°C within 2 days.

340

#### 341 *Water filtering and eDNA extraction from filter samples*

342 Bottled water samples were vacuum-filtered through 47-mm GF/F glass fiber filters  
343 (nominal pore size: 0.7 µm; GE Healthcare, Little Chalfont, UK) in the laboratory.

344 Following filtration, all filters were stored at -20°C prior to eDNA extraction. The field  
345 blank samples were processed in a similar manner. As an equipment control, we used 1  
346 L of Milli-Q water to monitor contamination during the filtering of the samples from  
347 each site and during the subsequent DNA extraction.

348 eDNA was extracted from filters using the method developed by Uchii et  
349 al.<sup>46</sup>. We incubated filters by submerging in a mixed buffer comprising 400 µL of  
350 Buffer AL (Qiagen, Hilden, Germany) and 40 µL of Proteinase K (Qiagen, Hilden,  
351 Germany) using a Salivette tube (Sarstedt, Nümbrecht, Germany) at 56°C for 30 min.  
352 The Salivette tube containing filters was centrifuged at 5000 × g for 5 min, after which  
353 we added 220 µL of TE buffer (10 mM Tris-HCl and 1 mM EDTA, pH = 8.0) onto the  
354 filter, which was then centrifuged at 5000 × g for 5 min. The DNA in the eluted solution  
355 was purified using a DNeasy Blood & Tissue kit (Qiagen, Hilden, Germany), which  
356 extracted the DNA in 200 µL of Buffer AE. Samples were stored at 20°C until used for  
357 the 1st PCR assay.

358

#### 359 *Library preparation and MiSeq sequencing*

360 Details of the two-step PCR procedure used for Illumina MiSeq sequencing have been  
361 described previously by Fujii et al.<sup>16</sup>. We performed the 1st PCR using MiFish-U-F and



362 MiFish-U-R primers<sup>22</sup>, which were designed to contain Illumina sequencing primer  
363 regions and 6-mer random bases, as follows:

364 Forward: 5'-*ACACTCTTTCCCTACACGACGCTCTTCCGATCT* NNNNNN

365 *GTCGGTAAAACTCGTGCCAGC*-3';

366 Reverse: 5'-*GTGACTGGAGTTCAGACGTGTGCTCTTCCGATCT* NNNNNN

367 *CATAGTGGGGTATCTAATCCCAGTTTG*-3',

368 in which the italicized and non-italicized base sequences represent the MiSeq  
369 sequencing primers and MiFish primers, respectively, and the six random bases (N)  
370 were used to enhance cluster separation on flow cells during the initial base call  
371 calibrations on MiSeq.

372 We performed the 1st PCR using a 12- $\mu$ L reaction volume containing 1 $\times$  PCR  
373 Buffer for KOD FX Neo polymerase (Toyobo, Osaka, Japan), 0.4 mM dNTP mix, 0.24  
374 U KOD FX Neo polymerase, 0.3  $\mu$ M of each primer, and 2  $\mu$ L of template DNA. The  
375 thermocycling conditions for this step were as follows: initial denaturation at 94°C for 2  
376 min; followed by 35 cycles of denaturation at 98°C for 10 s, annealing at 65°C for 30 s,  
377 and extension at 68°C for 30 s; and a final extension at 68°C for 5 min. The 1st PCRs  
378 were performed using eight replicates<sup>25</sup>, and the products of individual 1st PCR  
379 replicates were pooled and purified using AMPure XP (Beckman Coulter, Brea CA,  
380 USA) as templates for the 2nd PCR. The Illumina sequencing adapters and 8-bp  
381 identifier indices (the X sequence in the following primers) were added to the  
382 subsequent PCR process using the following forward and reverse fusion primers:

383 Forward: 5'-*AATGATACGGCGACCACCGAGATCTACA* XXXXXXXX

384 *ACACTCTTTCCCTACACGACGCTCTTCCGATCT*-3';

385 Reverse: 5'-*CAAGCAGAAGACGGCATACGAGAT*XXXXXXXXXX

386 GTGACTGGAGTTCAGACGTGTGCTCTTCCGATCT-3',

387 in which the italicized and non-italicized base sequences represent MiSeq P5/P7 adapter  
388 and sequencing primers, respectively. The eight X bases represent dual-index sequences  
389 inserted to identify different samples<sup>47</sup>. We performed the 2nd PCR with 12 cycles  
390 using a 12- $\mu$ L reaction volume containing 1 $\times$  KAPA HiFi HotStart ReadyMix, 0.3  $\mu$ M  
391 of each primer, and 1.0  $\mu$ L of the 1st PCR product. The thermocycling conditions after  
392 an initial 3-min denaturation at 95°C were as follows: denaturation at 98°C for 20 s,  
393 followed by combined annealing and extension at 72°C (shuttle PCR) for 15 s; and a  
394 final extension at the same temperature for 5 min. The 2nd PCR products were pooled  
395 in equal volumes and purified using AMPure XP.

396 The purified PCR products were loaded onto a 2% E-Gel SizeSelect agarose  
397 gel (Thermo Fisher Scientific, Waltham, MA, USA), and those of the target size  
398 (approximately 370 bp) were collected. The collected samples were quantified using a  
399 Qubit dsDNA HS assay kit and a Qubit 2.0 Fluorometer (Thermo Fisher Scientific). The  
400 amplicon libraries were sequenced using 2  $\times$  250 bp paired-end sequencing on the  
401 MiSeq platform using an MiSeq v2 Reagent Kit. Note that sequencing runs were  
402 performed for a total of 415 libraries, comprising 178 libraries constructed in the  
403 present study (144 samples, 18 field and filter blanks, and 16 PCR negative controls)  
404 and 237 libraries constructed in previous research projects. MiSeq sequencing was  
405 conducted at the Department of Environmental Solution Technology, Faculty of Science  
406 and Technology, Ryukoku University. All sequence data generated have been deposited  
407 in the DNA Data Bank of Japan [DRA, Accession number: (submitted)].

408

409 *Bioinformatic analysis for MiSeq sequencing*

410 The detailed procedures used for bioinformatics analyses have been described  
411 previously by Fujii et al.<sup>16</sup>. Initially, low-quality tails were trimmed from each read, and  
412 paired-end reads were then assembled. For the 5,225,947 reads thus obtained, primer  
413 sequences were removed, and identical sequences (i.e., 100% sequence similarity) were  
414 merged using UCLUST (usearch 7.0.1001)<sup>48</sup>. Sequences with ten or more identical  
415 reads were subjected to downstream processing. For taxonomic annotation, we  
416 conducted a local BLASTN search using BLAST 2.2.29 based on a previously  
417 established reference database of fish species for processed reads<sup>22</sup>. For each assessed  
418 sequence, the top BLAST hit with a sequence identity  $\geq 98.6\%$  was used for species  
419 detection. Note that a majority of the species were identified with a match of  $\geq 99\%$ .  
420 Based on the BLAST results, we identified the species and genus using previously  
421 described methods<sup>16,20</sup>. The sequence reads in the pipeline processes are listed in Table  
422 S2.

424 *Fish fauna record data*

425 We used fish fauna data from Japanese lakes published previously by Matsuzaki et  
426 al.<sup>7,49</sup>. These studies assembled information on the distribution (i.e., presence or  
427 absence) of strictly freshwater fish that are intolerant of saltwater and inhabit freshwater  
428 environments for their entire life cycle, based on extensive surveys of scientific papers,  
429 monographs and books, online databases (National Survey on the Natural Environment  
430 by the Ministry of the Environment and National Censuses on River Environments by  
431 the Ministry of Land, Infrastructure, Transport and Tourism), museum specimen  
432 databases collected by the National Museum of Nature and Science, local museum

433 specimens, prefectural and municipal reports, and gray literature, including reports of  
434 non-governmental organizations (NGOs) and universities. In the present study, using  
435 the same sources, we further added the distributions of secondary freshwater fish, which  
436 have a certain degree of salt tolerance and are occasionally able to cross narrow sea  
437 barriers, and peripheral freshwater fish, which are derived from marine ancestors and  
438 include diadromous fish that migrate between fresh and marine environments. Having  
439 compiled the distribution data, we generated a comprehensive dataset of fish fauna  
440 consisting of native and exotic fishes after extirpations and introductions. Finally, we  
441 obtained records for a total of 242 fish taxa (Table S3). To evaluate the performance of  
442 our eDNA metabarcoding survey, we assumed that the records obtained provided a  
443 reliable indication of the fish communities inhabiting the selected lakes.

444         We acknowledge the potential limitations associated with analyzing such  
445 compiled data, given that these data were not systematically collected. Moreover, fish  
446 were collected using a variety of apparatus and techniques (such as electrofishing, bag  
447 seines, trap nets, minnow traps, gill nets, hand nets, and fyke nets), by different entities,  
448 and within different studies with differing objectives. However, the utilization of  
449 integrated multiple sources can serve to minimize bias and summarize fish fauna in  
450 terms of temporal and spatial replication<sup>7,48</sup>.

451 ,

#### 452 *Fish trait data*

453 We obtained details on the ecological and biological traits of the detected and recorded  
454 fish species from FishBase<sup>50</sup>, which was searched using species names, and obtained the  
455 related data using the “species” and “ecology” functions of the “rfishbase” package  
456 (ver. 3.1.0) on March 4, 2020. We were able to obtain sufficient data on body length

457 (cm, including both total and standard lengths, but mainly standard length), recorded  
458 longevity in the wild (years), lateral body shape types, habitat types, and saltwater  
459 tolerance, but were unable to obtain sufficient data (for less than 12% of taxa) for  
460 certain traits, such as trophic position, and body weight, for further analysis.

461

#### 462 *Lake morphology and characteristic data*

463 We obtained data on lake morphology [surface area (km<sup>2</sup>), maximum water depth (m),  
464 mean water depth (m), and volume (km<sup>3</sup>)], and lake types [trophic state and water types  
465 (brackish or freshwater)] from Tanaka<sup>51</sup> (Table S1).

466

#### 467 *Statistical analyses*

468 To evaluate the performance of eDNA metabarcoding with respect to detecting species,  
469 we used “percentage record covered (%)” as a measure of the proportion of eDNA-  
470 detected species matching species recorded in the target lakes, which was calculated  
471 from the number of eDNA-detected species matched to the fish records per total number  
472 of recorded species in the dataset.

473 All statistical analyses and graphic preparations were performed using R ver.  
474 3.6.0<sup>52</sup>, and statistical values were evaluated at a significance level of  $\alpha = 0.05$ .

475 To compare eDNA metabarcoding and species record data, we compared  
476 taxonomic levels in the species list compiled based on visual surveys with those in the  
477 lists compiled using eDNA metabarcoding data (Table S1, S2) with reference to  
478 previous studies that have used MiFish primers<sup>16,20</sup>. To confirm that the sequencing  
479 depth was sufficient to detect fish diversity in the samples, we used the “rarefy” and

480 “rarecurve” functions of the “vegan” package (ver. 2.5.6) (Fig. S2). Thus, we used raw  
481 data for further analyses without rarefying the data.

482 We examined differences in the number of detected fish taxa and percentage  
483 records covered evaluated by eDNA metabarcoding among the sampling methods  
484 (individual, Mix\_cool, Mix\_freeze, and field and negative controls) using nested  
485 analysis of variance (nested ANOVA) based on LMMs with “lake” as the nested  
486 (random) factor, using the “anova.lme” and “lme” functions of the “nlme” package (ver.  
487 3.1.139), respectively. Tukey’s post hoc test was used for multiple comparisons for  
488 least-squares means using the “lsmeans” function of the “lsmeans” package (ver.  
489 2.30.0).

490 Differences in fish traits, body length (numeric data), habitats, lateral body  
491 shape types, and saltwater tolerance (categorical data) between high frequency of  
492 species detection (eDNA metabarcoding vs. species record) among the sampling  
493 methods (individual vs. Mix\_cool vs. Mix\_freeze) were examined using nested  
494 ANOVA and an LMM as described above. Prior to the GLM analyses, we calculated a  
495 variance inflation factor (VIF) to check the collinearity of the explanatory factors of the  
496 GLMs. We found that the maximum VIF value was 1.23 and that all VIF values were  
497 less than 5.

498 We also performed GLM analysis to evaluate the relationships between the  
499 percentage record covered of the species record and the explanatory factors of lake  
500 ecosystems, including lake latitude and altitude, morphology (surface area, maximum  
501 water depth, mean water depth, and volume), trophic state (eutrophic vs. meso- and  
502 oligotrophic), and water types (freshwater vs. brackish) using the “glm” function. We  
503 set “binomial” as the error distribution of the GLMs and added the total number of

504 species records as the offset factor. In this case, we found that the maximum VIF value  
505 was 49.7, indicating that collinearity among the factors could potentially influence the  
506 parameter estimations in the GLMs. After removing the explanatory factors with a VIF  
507 value  $>5$  to reduce the collinearity effect on the GLMs, we finally performed the GLMs  
508 using latitude, surface area, mean water depth, trophic state, and water types for all  
509 sampling methods.

510 We performed indicator taxa analysis<sup>53</sup> to determine those taxa showing  
511 significantly different frequencies between the eDNA metabarcoding and species record  
512 species lists. The analysis was performed using the “signassoc” function of the  
513 “indicspecies” package (ver. 1.7.6) based on presence/absence data<sup>53</sup>. We used mode =  
514 1 (group-based) and calculated the P values with 999 permutations after applying  
515 Sidak’s correction for multiple testing.

516 Differences in community compositions were visualized using non-metric  
517 multidimensional scaling (NMDS) with 500 separate runs of real data. The community  
518 dissimilarity for NMDS was calculated using incidence-based Jaccard indices. We also  
519 calculated NMDS stress to confirm the representation of the NDMS ordination and  
520 evaluated differences in community structures between sampling methods and sites  
521 using PERMANOVA, for which we used an incidence-based Jaccard similarity matrix  
522 and calculated the statistical values with 999 permutations. For NMDS and  
523 PERMANOVA analyses, we used the “metaMDS” and “Adonis” functions of the  
524 “vegan” package (ver. 2.5.6), respectively.

525

526 **Acknowledgments**

527 This study was supported by the Environment Research and Technology Development  
528 Fund (4-1602, 4-1705, 4-2004) of the Environmental Restoration and Conservation  
529 Agency, Japan, and JST-CREST (JPMJCR13A2).

530

### 531 **Data availability**

532 All data obtained from MiSeq sequencing are available in DRA [Accession number:  
533 DRA (submitted)], and all data used, including all species detected based on MiSeq  
534 sequencing, the recorded species data, and lake data used for analysis, are shown in the  
535 Supplemental tables.

536

### 537 **Author contributions**

538 HD designed the study, and HA, KI, AK, KK, NM, T Mitsuzuka, TT, KT, NU, TW, and  
539 KY contributed to field sampling. SSM contributed to preparing the dataset of the fish  
540 presence records. S. Matsuoka, MN, HD, HS, HY, S Matsuhashi, SY, T Minamoto, and  
541 MM contributed to laboratory and molecular experiments. HD, S Matsuoka, and SSM  
542 analyzed the data. HD, S Matsuoka, SSM, and MM wrote the initial draft of the  
543 manuscript. All other authors critically reviewed the manuscript.

544

### 545 **References**

- 546 1. Dudgeon, D. et al. Freshwater biodiversity: importance, threats, status and  
547 conservation challenges. *Biol. Rev.* **81**, 163–182 (2006).  
548
- 549 2. Flitcroft, R., Cooperman, M. S., Harrison, I. J., Juffe-Bignoli, D. & Boon, P. J.  
550 Theory and practice to conserve freshwater biodiversity in the Anthropocene.  
551 *Aquat. Cons. Mar. Freshw. Ecosyst.* **29**, 1013–1021 (2019).  
552
- 553 3. Strayer, D. L. & Dudgeon, D. Freshwater biodiversity conservation: recent progress  
554 and future challenges. *J. North Am. Benthol. Soc.* **29**, 344–358 (2010).  
555



- 556 4. Collen, B. et al. Global patterns of freshwater species diversity, threat and endemism.  
557 *Glob. Ecol. Biog.* **23**, 40–51 (2014).  
558
- 559 5. Gardner, J. L., Amano, T., Sutherland, W. J., Joseph, L. & Peters, A. Are natural  
560 history collections coming to an end as time-series? *Front. Ecol. Env.* **12**, 436–  
561 438 (2014).  
562
- 563 6. Schindler, D. E. & Hilborn, R. Prediction, precaution, and policy under global  
564 change. *Science* **347**, 953–954(2015).  
565
- 566 7. Matsuzaki, S. S., Sasaki, T. & Akasaka, M. Invasion of exotic piscivores causes  
567 losses of functional diversity and functionally unique species in Japanese  
568 lakes. *Freshw. Biol.* **61**, 1128–1142 (2016a).  
569
- 570 8. Socolar, J. B., Gilroy, J. J., Kunin, W. E. & Edwards, D. P. How should beta-  
571 diversity inform biodiversity conservation? *Trends Ecol. Evol.* **31**, 67–80 (2016).  
572
- 573 9. Nishihiro, J. et al. Heterogeneous distribution of a floating-leaved plant, *Trapa*  
574 *japonica*, in Lake Mikata, Japan, is determined by limitations on seed dispersal  
575 and harmful salinity levels. *Ecol. Res.* **29**, 981–989 (2014).  
576
- 577 10. Takahara, T., Minamoto, T., Yamanaka, H., Doi, H. & Kawabata, Z. Estimation of  
578 fish biomass using environmental DNA. *PLoS ONE* **7**, e35868 (2012).  
579
- 580 11. Rees, H. C., Maddison, B. C., Middleditch, D. J., Patmore, J. R. & Gough, K. C.  
581 Review: the detection of aquatic animal species using environmental DNA—a review  
582 of eDNA as a survey tool in ecology. *J. Appl. Ecol.* **51**, 1450–1459 (2014).  
583
- 584 12. Goldberg, C. S., Strickler, K. M. & Pilliod, D. S. Moving environmental DNA  
585 methods from concept to practice for monitoring aquatic macroorganisms. *Biol.*  
586 *Cons.* **183**, 1–3 (2015).  
587
- 588 13. Thomsen, P. F. & Willerslev, E. Environmental DNA—an emerging tool in  
589 conservation for monitoring past and present biodiversity. *Biol. Cons.* **183**, 4–18  
590 (2015).  
591
- 592 14. Doi, H. et al. Environmental DNA analysis for estimating the abundance and  
593 biomass of stream fish. *Freshw. Biol.* **6**, 30–39 (2017a).  
594
- 595 15. Yamamoto, S. et al. Environmental DNA metabarcoding reveals local fish  
596 communities in a species-rich coastal sea. *Sci. Rep.* **7**, 1–12 (2017).  
597
- 598 16. Fujii, K., Doi, H., Matsuoka, S., Nagano, S., Sato, H. & Yamanaka, H.  
599 Environmental DNA metabarcoding for fish community analysis in backwater  
600 lakes: A comparison of capture methods. *PLoS ONE* **14**, e0210357 (2019).  
601

- 602 17. Bylemans, J. et al. Monitoring riverine fish communities through eDNA  
603 metabarcoding: determining optimal sampling strategies along an altitudinal and  
604 biodiversity gradient. *Metabar. Metagen.* **2**, e30457 (2018).  
605
- 606 18. Deiner, K., Fronhofer, E. A., Mächler, E., Walser, J. C. & Altermatt, F.  
607 Environmental DNA reveals that rivers are conveyor belts of biodiversity  
608 information. *Nat. Comm.* **7**, 12544 (2016).  
609
- 610 19. Deiner, K. et al. Environmental DNA metabarcoding: Transforming how we survey  
611 animal and plant communities. *Mol. Ecol.* **26**, 5872–5895 (2017).  
612
- 613 20. Sato, H., Sogo, Y., Doi, H. & Yamanaka, H. Usefulness and limitations of sample  
614 pooling for environmental DNA metabarcoding of freshwater fish communities.  
615 *Sci. Rep.* **7**, 14860 (2017).  
616
- 617 21. Taberlet, P., Coissac, E., Pompanon, F., Brochmann, C. & Willerslev, E. Towards  
618 next-generation biodiversity assessment using DNA metabarcoding. *Mol. Ecol.*  
619 **21**, 2045–2050 (2012).  
620
- 621 22. Miya, M. et al. MiFish, a set of universal PCR primers for metabarcoding  
622 environmental DNA from fishes: detection of more than 230 subtropical marine  
623 species. *Royal Soc. Open Sci.* **i**, 150088 (2015).  
624
- 625 23. Nakagawa, H., Yamamoto, S., Sato, Y., Sado, T., Minamoto, T. & Miya, M.  
626 Comparing local- and regional-scale estimations of the diversity of stream fish  
627 using eDNA metabarcoding and conventional observation methods. *Freshw.*  
628 *Biol.* **63**, 569–580 (2018).  
629
- 630 24. Collins, M. K. et al. Searching for a Salamander: Distribution and Habitat of the  
631 Mudpuppy (*Necturus maculosus*) in Southeast Ohio Using eDNA as a Rapid  
632 Assessment Technique. *Ame. Midland Nat.* **182**, 191-202 (2019).  
633
- 634 25. Doi, H., Fukaya, K., Oka, S. I., Sato, K., Kondoh, M. & Miya, M. Evaluation of  
635 detection probabilities at the water-filtering and initial PCR steps in  
636 environmental DNA metabarcoding using a multispecies site occupancy model.  
637 *Sci. Rep.* **9**, 3581 (2019).  
638
- 639 26. Cilleros, K. et al. Unlocking biodiversity and conservation studies in high-diversity  
640 environments using environmental DNA (eDNA): A test with Guianese  
641 freshwater fishes. *Mol. Ecol. Res.* **19**, 27–46 (2019).  
642
- 643 27. Li, J. et al. Ground-truthing of a fish-based environmental DNA metabarcoding  
644 method for assessing the quality of lakes. *J. Appl. Ecol.* **56**, 1232–1244 (2019).  
645
- 646 28. Jerde, C. L., Wilson, E. A. & Dressler, T. L. Measuring global fish species richness  
647 with eDNA metabarcoding. *Mol. Ecol. Res.* **19**, 19–22 (2019).  
648

- 649 29. Stat, M. et al. Ecosystem biomonitoring with eDNA: metabarcoding across the tree  
650 of life in a tropical marine environment. *Sci. Rep.* **7**, 1–11 (2017).  
651
- 652 30. Maruyama, A. et al. The release rate of environmental DNA from juvenile and adult  
653 fish. *PLoS One*, **9**, e114639 (2014).  
654
- 655 31. Pont, D. et al. The future of fish-based ecological assessment of European rivers:  
656 from traditional EU Water Framework Directive compliant methods to eDNA  
657 metabarcoding-based approaches. *J. Fish Biol.* 1–13 (2019).  
658
- 659 32. Deiner, K., Walser, J. C., Mächler, E. & Altermatt, F. Choice of capture and  
660 extraction methods affect detection of freshwater biodiversity from  
661 environmental DNA. *Biol. Cons.* **183**, 53–63 (2015).  
662
- 663 33. Takahara, T., Minamoto, T. & Doi, H. Using environmental DNA to estimate the  
664 distribution of an invasive fish species in ponds. *PLoS ONE* **8**, e56584 (2013).  
665
- 666 34. Nilsson, A. N., Elmberg, J. & Sjöberg, K. Abundance and species richness patterns  
667 of predaceous diving beetles (Coleoptera, Dytiscidae) in Swedish lakes. *J.*  
668 *Biogeogr.* **82**, 197-206 (1994).  
669
- 670 35. Bista, I. et al. Annual time-series analysis of aqueous eDNA reveals ecologically  
671 relevant dynamics of lake ecosystem biodiversity. *Nat. Comm.* **8**, 14087 (2017).  
672
- 673 36. Doi, H. et al. Water sampling for environmental DNA surveys by using an  
674 unmanned aerial vehicle. *Limnol. Ocean. Meth.* **15**, 939–944 (2017b).  
675
- 676 37. Dodson, S. I., Arnott, S. E. & Cottingham, K. L. The relationship in lake  
677 communities between primary productivity and species richness. *Ecology* **81**,  
678 2662-2679 (2000).  
679
- 680 38. Post, D. M., Pace, M. L. & Hairston, N. G. Ecosystem size determines food-chain  
681 length in lakes. *Nature* **405**, 1047-1049 (2000).  
682
- 683 39. Wetzel R. G. Limnology: lake and river ecosystems. 3rd edition. Gulf professional  
684 publishing, Huston, USA (2001)  
685
- 686 40. Harper, L. R. et al. Prospects and challenges of environmental DNA (eDNA)  
687 monitoring in freshwater ponds. *Hydrobiologia* **826**, 25–41 (2019).  
688
- 689 41. Guillera-Arroita, G., Lahoz-Monfort, J. J., van Rooyen, A. R., Weeks, A. R. &  
690 Tingley, R. Dealing with false-positive and false-negative errors about species  
691 occurrence at multiple levels. *Meth. Ecol. Env.* **8**, 1081–1091 (2017).  
692
- 693 42. Lahoz-Monfort, J. J., Guillera-Arroita, G. & Tingley, R. Statistical approaches to  
694 account for false - positive errors in environmental DNA samples. *Mol.*  
695 *Ecol.Res.* **16**, 673-685 (2016).

- 696 43. Connor, E. F. & McCoy, E. D. The statistics and biology of the species-area  
697 relationship. *Am. Nat.* **113**, 791–833 (1979).  
698
- 699 44. Ugland, K. I., Gray, J. S. & Ellingsen, K. E. The species–accumulation curve and  
700 estimation of species richness. *J. Anim. Ecol.* **72**, 888–897 (2003).  
701
- 702 45. Sigsgaard, E. E. et al. Using vertebrate environmental DNA from seawater in  
703 biomonitoring of marine habitats. *Cons. Biol.* **34**, 697–710 (2020).  
704
- 705 46. Uchii, K., Doi, H. & Minamoto, T. A novel environmental DNA approach to  
706 quantify the cryptic invasion of non-native genotypes. *Mol. Ecol. Res.* **16**, 415–  
707 422 (2016).  
708
- 709 47. Hamady, M., Walker, J. J., Harris, J. K., Gold, N. J. & Knight, R. Error-correcting  
710 barcoded primers for pyrosequencing hundreds of samples in multiplex. *Nat. Meth.*  
711 **5**, 235–237 (2008).  
712
- 713 48. Edgar, R. C. Search and clustering orders of magnitude faster than BLAST.  
714 *Bioinformatics* **26**, 2460–2461 (2010).  
715
- 716 49. Matsuzaki, S.S. et al. Biodiversity of freshwater fish and aquatic macrophytes in  
717 Japanese lakes: a broad assessment. *Jap. J. Cons. Ecol.* **21**, 155–165 (2016b). (in  
718 Japanese)  
719
- 720 50. Froese, R. & Pauly D. (Eds.). (2019, December Day). FishBase [Database].  
721 Retrieved from [www.fishbase.org](http://www.fishbase.org)  
722
- 723 51. Tanaka M. The Lakes in Japan, 530 pp. in Japanese, Nagoya University Press,  
724 Nagoya, (1992).  
725
- 726 52. R Core Team. R: A language and environment for statistical computing. R  
727 Foundation for Statistical Computing, Vienna, Austria (2019). Retrieved from  
728 <https://www.R-project.org/>  
729
- 730 53. Cáceres, M. D. & Legendre, P. Associations between species and groups of sites:  
731 indices and statistical inference. *Ecology* **90**, 3566–3574 (2009).  
732  
733  
734

735

736 **Table**

737 Table 1. Significantly higher frequencies of species detected using eDNA  
738 metabarcoding compared with species records, as determined based on indicator taxa  
739 analysis ( $P < 0.05$ ). “Best” indicates the method facilitating the most frequent detection.  
740 P values were calculated based on 999 permutations subsequent to Sidak’s correction  
741 for multiple testing. Species detected at non-significant, and significantly lower  
742 frequencies in the species records are shown in Table S7.

| Method     | Species name                      | P value for eDNA | P value for species records | Best method | P value for multiple testing |
|------------|-----------------------------------|------------------|-----------------------------|-------------|------------------------------|
| Individual | <i>Carassius auratus</i>          | 0.001            | 1                           | eDNA        | 0.001999                     |
| Individual | <i>Hemibarbus labeo</i>           | 0.001            | 1                           | eDNA        | 0.001999                     |
| Individual | <i>Hypophthalmichthys nobilis</i> | 0.001            | 1                           | eDNA        | 0.001999                     |
| Individual | <i>Zacco platypus</i>             | 0.001            | 1                           | eDNA        | 0.001999                     |
| Mix_cool   | <i>Carassius auratus</i>          | 0.001            | 1                           | eDNA        | 0.001999                     |
| Mix_cool   | <i>Zacco platypus</i>             | 0.023            | 0.997                       | eDNA        | 0.045471                     |
| Mix_freeze | <i>Carassius auratus</i>          | 0.001            | 1                           | eDNA        | 0.001999                     |
| Mix_freeze | <i>Rhinogobius</i> spp.           | 0.023            | 0.997                       | eDNA        | 0.045471                     |

743

744

745

746 **Figures**

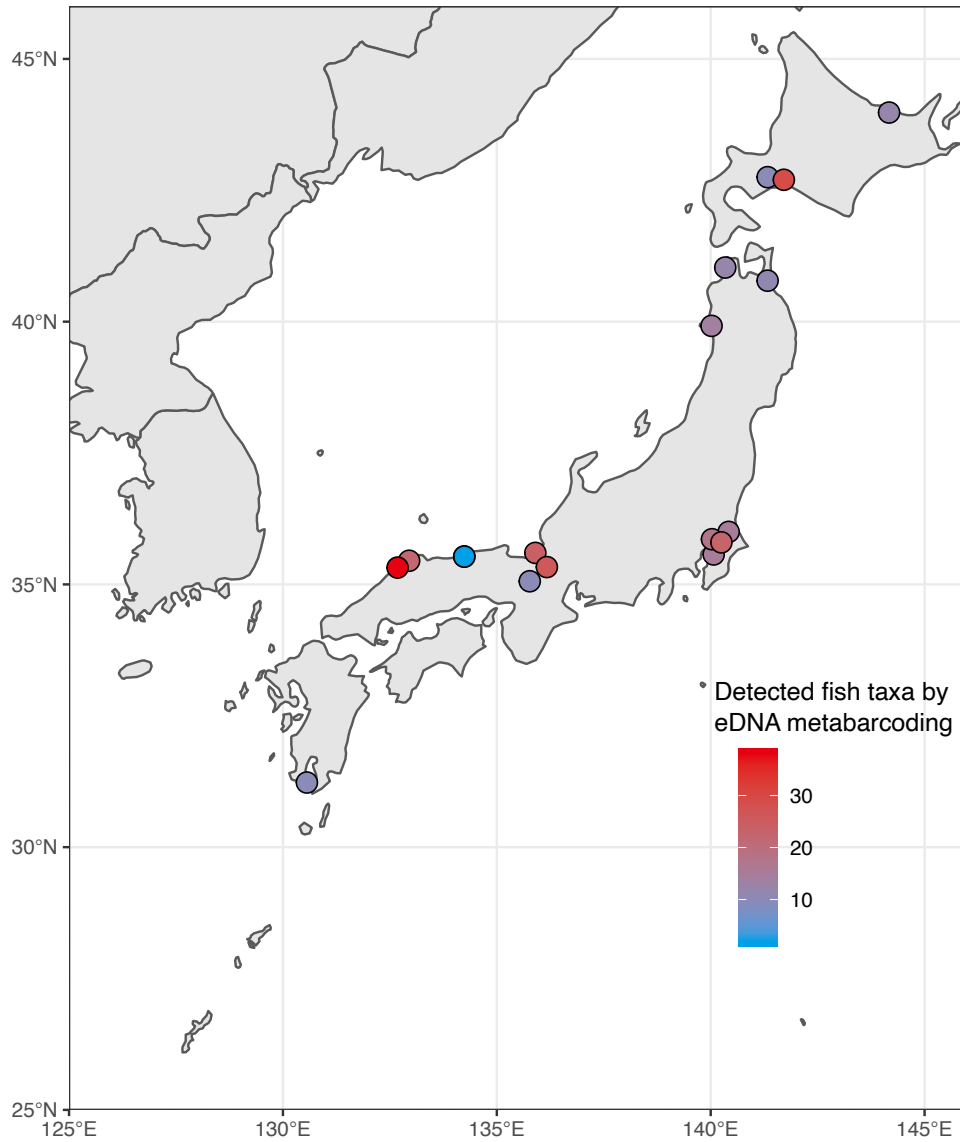

747

748 Figure 1. A map of Japan showing the locations of the 18 study lakes. The color of  
749 circles indicates the approximate numbers of fish taxa detected using eDNA  
750 metabarcoding based on the Mix\_cool sampling method. Total numbers of fish taxa  
751 detected using other sampling methods (Individual and Mix\_freeze) are shown in Fig.  
752 S3.

753

754

755

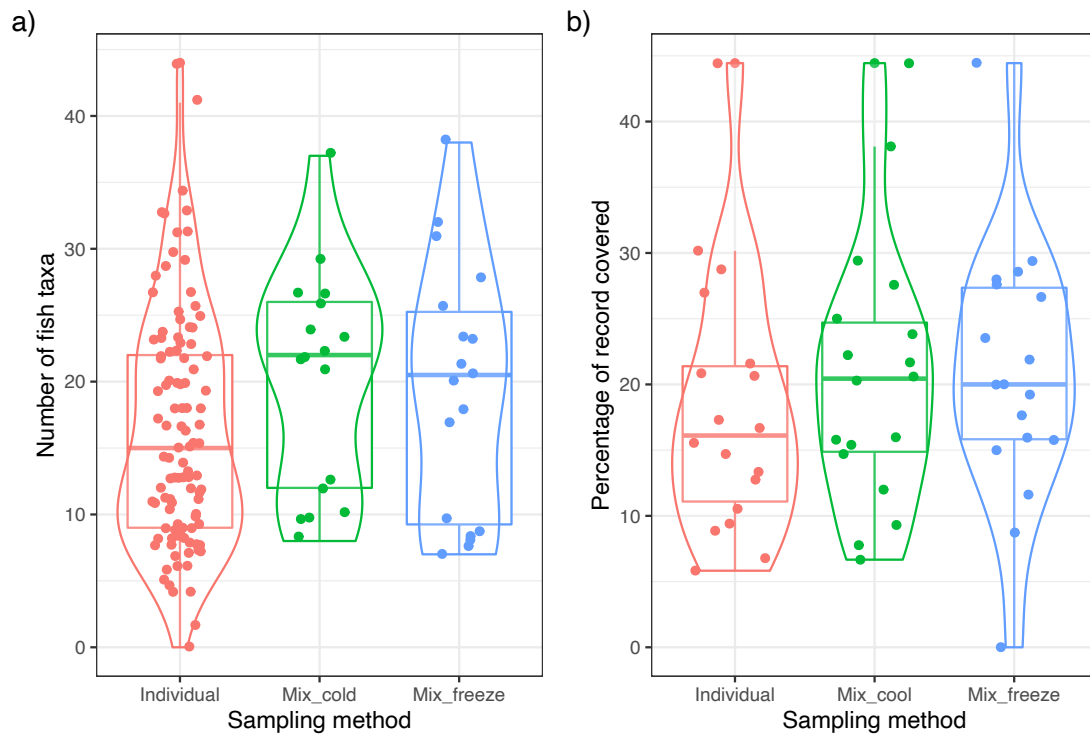

756

757

758 Figure 2. Box and violin plots showing (a) the fish taxa detected and (b) the percentage  
759 of record covered (%) with eDNA metabarcoding using different sampling methods.  
760 The boxes and bars in the box plots indicate median  $\pm$  inter-quartiles and  $\pm 1.5 \times$  inter-  
761 quartiles, respectively. The points represent individual data values. The smooth lines  
762 indicate the distribution of the data using violin plots. The violin plot outlines illustrate  
763 kernel probability density, i.e., the width of the enclosed area represents the proportion  
764 of the data located.

765

766

767

768

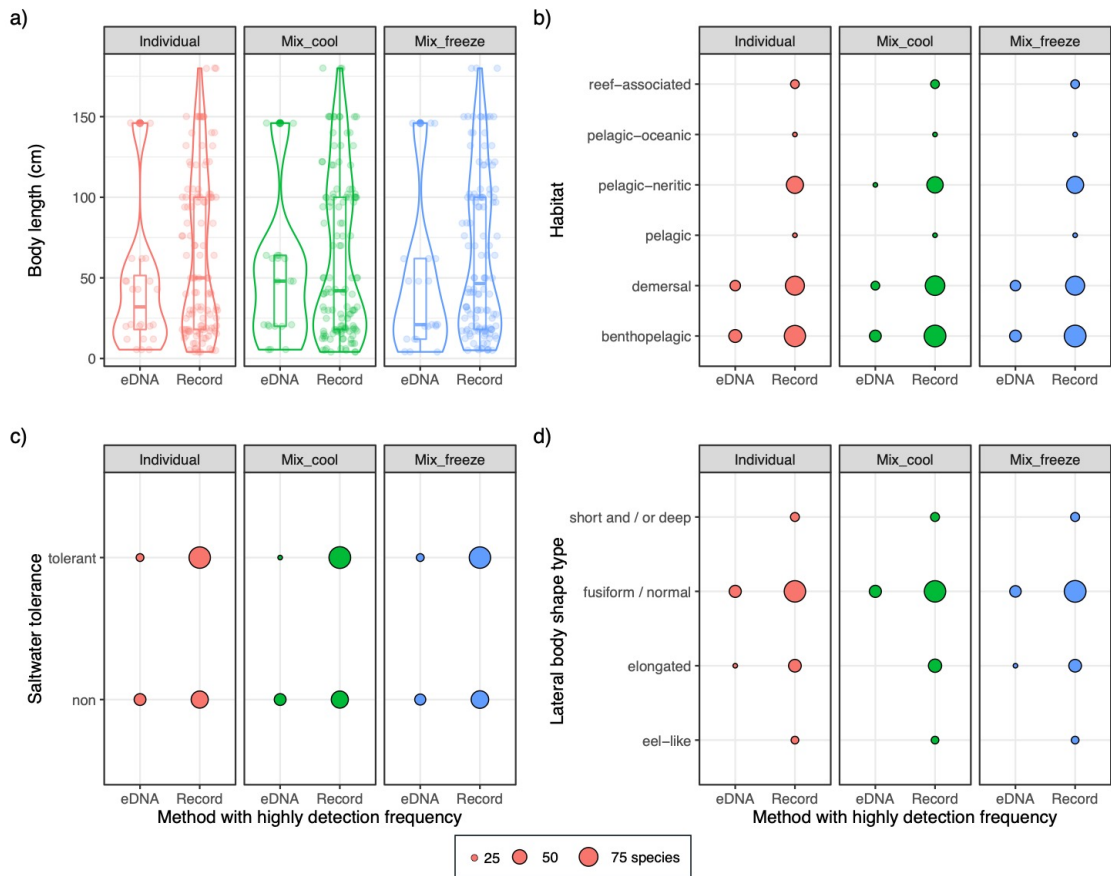

769

770 Figure 3. The ecological/biological traits of fish species in species group most  
 771 frequently detected based on eDNA metabarcoding and in the species records using the  
 772 different sampling methods, as evaluated based on indicator taxa analysis. (a) Box and  
 773 violin plots for body length. The boxes and bars in the box plots indicate median  $\pm$   
 774 inter-quartiles and  $\pm 1.5 \times$  inter-quartiles, respectively. The smooth lines indicate the  
 775 distribution of the data using violin plots. The violin plot outlines illustrate kernel  
 776 probability density, i.e., the width of the enclosed area represents the proportion of the  
 777 data located. The points represent individual data values. (b-d) Balloon plots indicating  
 778 the habitat preference (b), saltwater tolerance (c), and lateral body shape type (d) of fish  
 779 species. The sizes of balloons in (b), (c), and (d) indicate the number of species in each  
 780 category, as shown in the bottom legend.



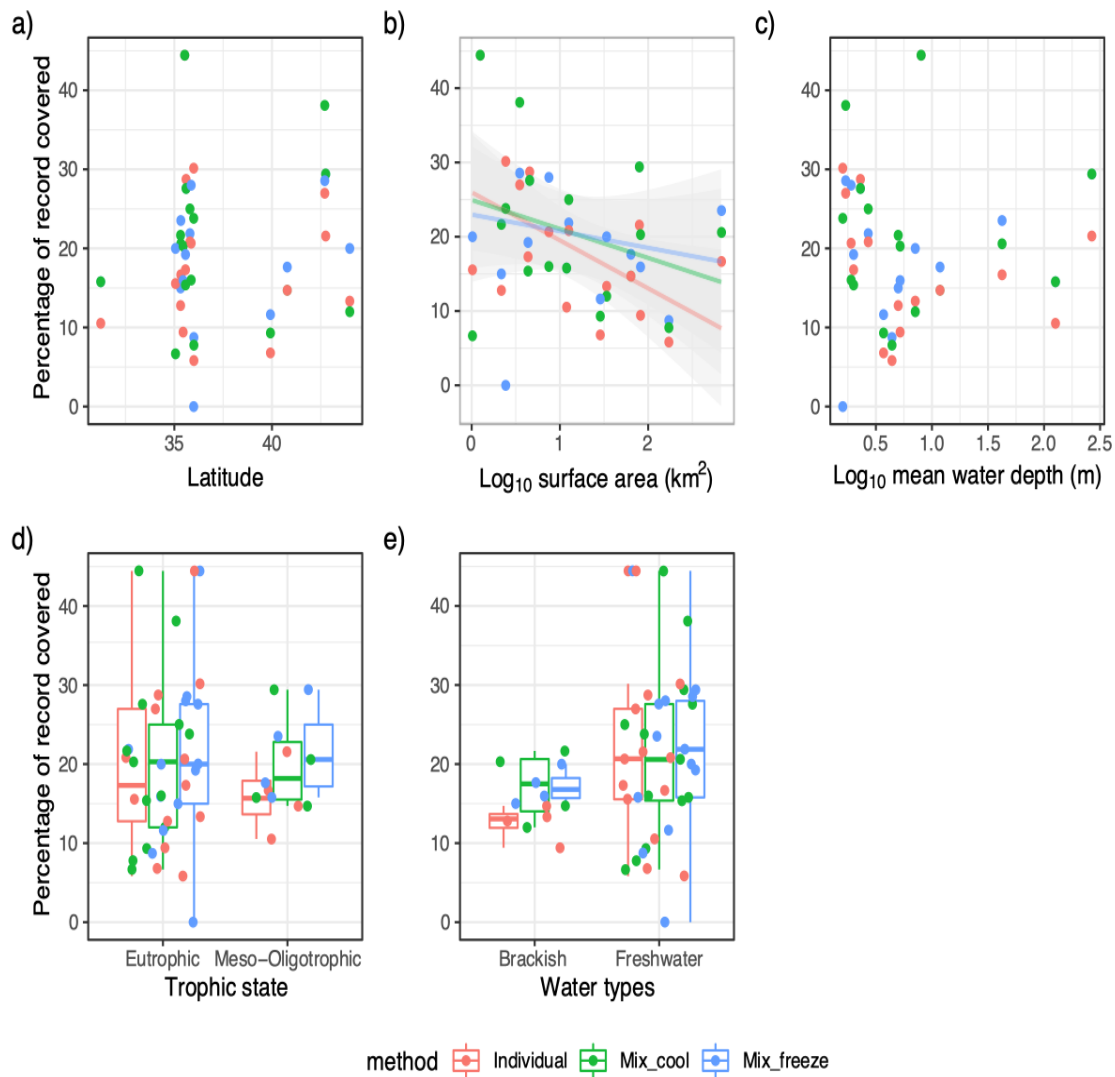

781  
782

783 Figure 4. The relationships between the percentage of record covered by eDNA  
784 metabarcoding (%) against the fish records and (a) lake latitude, (b) lake surface area,  
785 (c) lake mean depth, (d) trophic state, and (e) water type, including the final GLMs,  
786 using the different sampling methods (red = Individual, green = Mix\_cool, and blue =  
787 Mix\_freeze). Plots show the relationships with other factors are shown in Fig. S8. The  
788 solid and gray areas indicate the regression line from the significant GLM results and  
789 the 95% CI, respectively. The boxes and bars in the box plot indicate median  $\pm$  inter-  
790 quartiles and  $\pm 1.5 \times$  inter-quartiles, respectively. The points represent individual data  
791 values.

792

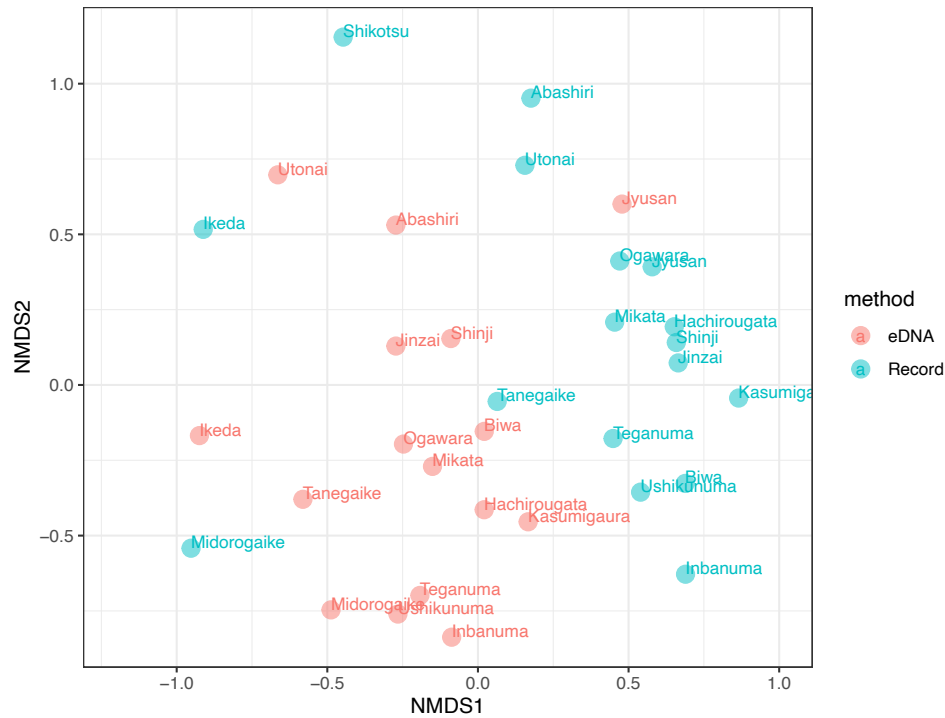

793  
794 Figure 5. A non-metric multidimensional scaling (NMDS) ordination plot for fish  
795 communities based on species records and eDNA metabarcoding using Mix\_cool  
796 samples. The NMDS stress was 0.174. NDMS plots for Individual and Mix\_freeze data  
797 are shown in Figs. S8 and S9, respectively.
